# Supplementary material for: SUCNR1 regulates insulin secretion and glucose elevates the succinate response in people with prediabetes
Source: JCI journal article supplement (doi:10.1172/jci173214), 2024-05-07
Supplement: sd1 [file 1]

301 Moved Permanently

# Moved Permanently

The document has moved here.
